# Supplementary material
Source: PubMed Central journal article supplement (PMC11386694)
Supplement: PBI-17-1069-s001.pdf [file PBI-17-1069-s001.pdf]

## SUPPORTING INFORMATION

### **Efficient production of antifungal proteins in plants using a new transient expression vector derived from tobacco mosaic virus**

Xiaoqing Shi<sup>1§</sup>, Teresa Cordero<sup>2§</sup>, Sandra Garrigues<sup>3</sup>, Jose F. Marcos<sup>3</sup>, José-Antonio Daròs<sup>2\*</sup>, and María Coca<sup>1\*</sup>

<sup>1</sup>*Centre for Research in Agricultural Genomics (CRAG, CSIC-IRTA-UAB-UB), 08193 Cerdanyola del Vallès, Spain*

<sup>2</sup>*Instituto de Biología Molecular y Celular de Plantas (IBMCP, CSIC-Universitat Politècnica de València), 46022 Valencia, Spain*

<sup>3</sup>*Instituto de Agroquímica y Tecnología de Alimentos (IATA, CSIC), 46980 Paterna, Spain*

§X.S. and T.C. contributed equally to this work.

\*Correspondence (email: [jadaros@ibmcp.upv.es](mailto:jadaros@ibmcp.upv.es), [maria.coca@cragenomica.es](mailto:maria.coca@cragenomica.es))

**Running title:** A new viral system for efficient AFP production

**Keywords:** antifungal proteins, viral vector, tobacco mosaic virus, plant biofactory, *Nicotiana benthamiana*, Gibson assembly.

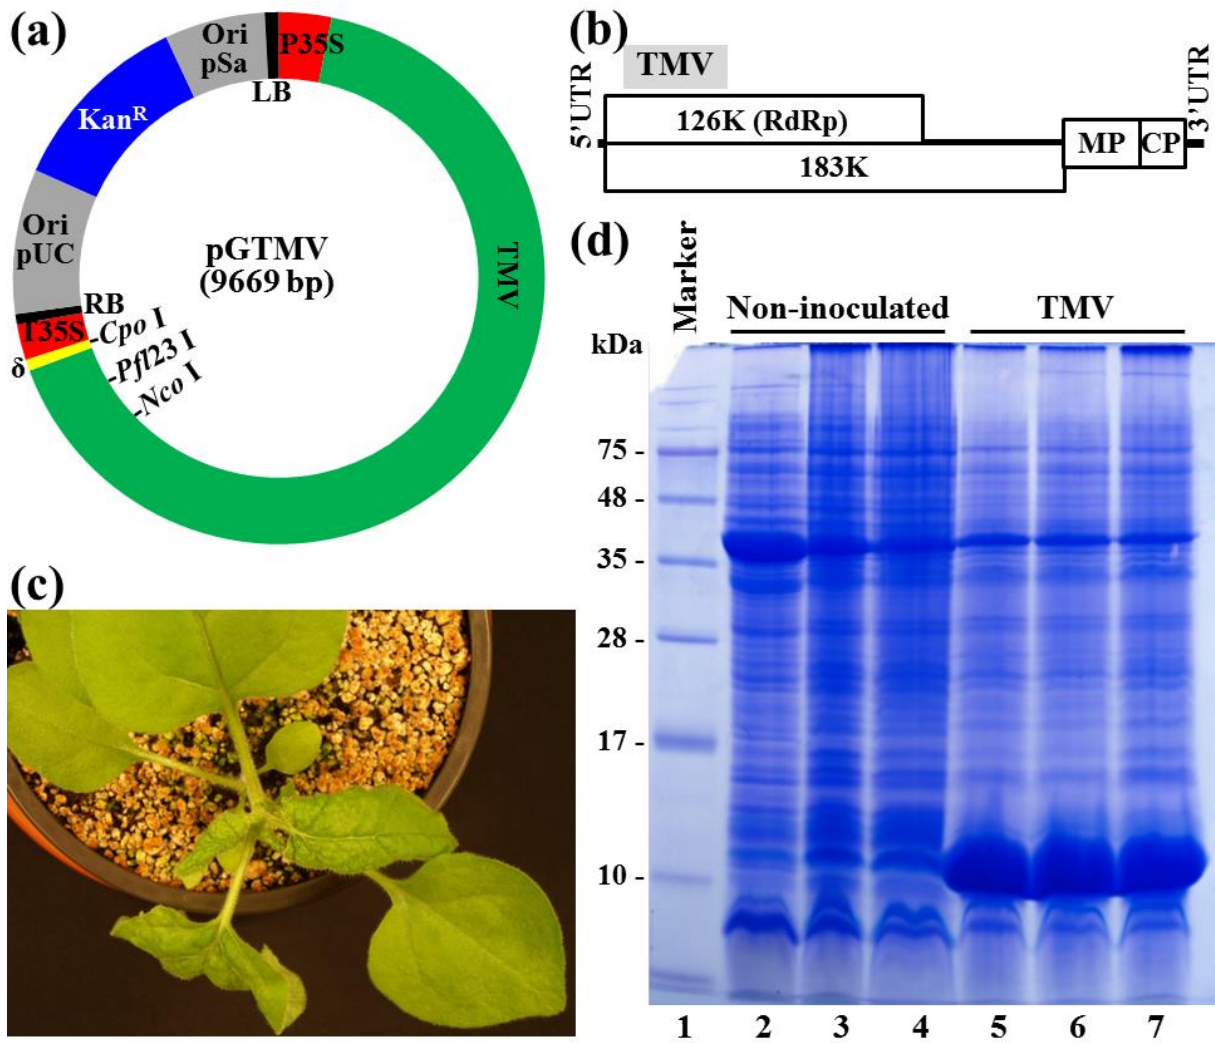

**Figure S1.** *Tobacco mosaic virus* (TMV) infectious clone. (a) Schematic representation of plasmid pGTMV that contains the whole TMV cDNA. See more details in the legend to Figure 1. (b) Schematic representation of wild-type TMV genome. Boxes represent the 126K and 183K replication proteins, movement protein (MP) and coat protein (CP). Lines represent the 5' and 3' untranslated regions (UTRs). (c) *Nicotiana benthamiana* plant infected with wild-type TMV. Picture was taken 5 days post-inoculation (dpi). (d) Coomassie blue-stained polyacrylamide gel showing the protein content of *N. benthamiana* leaves from plants mock-inoculated (lanes 2 to 4) or agroinoculated with TMV (lanes 5 to 7). Lane 1, marker proteins with sizes in kDa indicated on the left.

**Figure S2.** Full sequences of plasmid pGTMV, which contains a full-length TMV infectious clone (GenBank accession number MK087763), and intermediate plasmids pMTMVi-N and pMTMVi-M, which can be used to construct recombinant TMV clones unable and able to move systemically throughout the plant, respectively.

>pGTMV (9669 bp)

GCGGCCGCGATTCCATTGCCAGCTATCTGTCACTTTATTGTGAAGATAGTGAAAAAGGAAGGTGGCTCCTACAA  
 ATGCCATCATTGCGATAAAGGAAAGGCCATCGTTGAAGATGCCTCTGCCGACAGTGGTCCCAAAGATGGACCCCC  
 ACCCAGGAGCATCGTGGAAAAAGAAGACGTTCCAACCACGCTTCAAAGCAAGTGGATTGATGTGATATCTC  
 CACTGACGTAAGGGATGACGCACAATCCCACCTATCCTTCGCAAGACCCCTCCTCTATATAAGGAAGTTCATTTCA  
 TTTGGAGAGGTATTTTTTACAACAATTACCAACAACAACAACAACAACAACAACAATTACAATTAATAAATTA  
 CAATGGCATAACACAGACAGCTACCACATCAGCTTTGCTGGACACTGTCCGAGGAAAACAACCTCTGGTCAATG  
 ATCTAGCAAAGCGTCGTCTTTACGACACAGCGGTTGAAGAGTTTAAACGCTCGTGACCGCAGGCCAAAGGTGAACT  
 TTTCAAAGTAATAAGCGAGGAGCAGACGCTTATTGCTACCCGGCGTATCCAGAATTCCAAATTACATTTTATA  
 ACACGCAAAATGCCGTGCATTGCTTGCAGGTGGATTGCGATCTTTAGAACTGGAATATCTGATGATGCAAAATC  
 CCTACGGATCATTGACTTATGACATAGGCGGGAATTTTGCATCGCATCTGTTCAAGGGACGAGCATATGTACACT  
 GCTGCATGCCAACCTGGACGTTTCGAGACATCATGCGGCACGAAGGCCAGAAAGACAGTATTGAACTATACCTTT  
 CTAGGCTAGAGAGAGGGGGGAAAACAGTCCCCAACTTCCAAAAGGAAGCATTGACAGATACGCAGAAATTCCTG  
 AAGACGCTGTCTGTACAATACTTTCCAGACATGCGAACATCAGCCGATGCAGCAATCAGGCAGAGTGTATGCCA  
 TTGCGCTACACAGCATATATGACATAACAGCCGATGAGTTCCGGGGCGGCACCTCTTGAGGAAAAATGTCATACGT  
 GCTATGCCGCTTTCCACTTCTCCGAGAACCTGCTTCTTGAAGATTCATGCGTCAATTTGGACGAAAATCAACGCGT  
 GTTTTTCGCGCGATGGAGACAAGTTGACCTTTTCTTTTGCATCAGAGAGTACTCTTAATTAATGTCATAGTTATT  
 CTAATATTCTTAAGTATGTGTGCAAACTTACTTCCCGCCTCTAATAGAGAGGTTTACATGAAGGAGTTTTTAG  
 TCACCAGAGTTAATACCTGGTTTTGTAAAGTTTTCTAGAATAGATACTTTTTCTTTTGTACAAAGGTGTGGCCATA  
 AAAGTGTAGATAGTGAGCAGTTTTATACTGCAATGGAAGACGCATGGCATTACAAAAGACTCTTGCAATGTGCA  
 ACAGCAGAGAGAATCCTCCTTGGAGATTCATCAGTCAGTCAATTAATGTTTTCCAAAATGAGGGATATGGTCAATG  
 TACCATTATTCGACATTTCTTTGGAGACTAGTAAGAGGACGCGCAAGGAAGTCTTAGTGTCCAAGGATTCGTGT  
 TTACAGTGCTTAACCACATTGCAACATAACAGGCGAAAGCTCTTACATACGCAAAATGTTTTGTCCTTCGTGCAAT  
 CGATTGATCGAGGGTAATCATTAAACGGTGTGACAGCGAGGTCCGAATGGGATGTGGACAAAATCTTTGTTACAAT  
 CCTTGTCCATGACGTTTTTACCTGCATACTAAGCTTGCCGTTCTAAAGGATGACTTACTGATTAGCAAGTTTAGTC  
 TCGGTTCGAAAACGGTGTGCCAGCATGTGTGGGATGAGATTTGCTGGCGTTTGGGAACGCATTTCCCTCCGTGA  
 AAGAGAGGCTCTTGAACAGGAACTTATCAGAGTGGCAGGCGACGCATTAGAGATCAGGGTGCCTGATCTATATG  
 TGACCTTCCACGACAGATTAGTGACTGAGTACAAGGCCTCTGTGGACATGCCTGCGCTTGACATTAGGAAGAAGA  
 TGAAGAAACGGAAGTGTGATGACAATGCACTTTTCAAGATTATCGGTGTTAAGGGAGTCTGACAAAATTCGATGTTG  
 ATGTTTTTTCCAGATGTGCCAATCTTTGGAAGTTGACCCAATGACGGCAGCGAAGGTTATAGTCGCGGTTCATGA  
 GCAATGAGAGCGGTCTGACTCTCACATTTGAACGACCTACTGAGGCGAATGTTGCGCTAGCTTTACAGGATCAAG  
 AGAAGGCTTCAAGAGGTGCATTGGTAGTTACCTCAAGAGAAAGTTGAAGAACCCTCCATGAAGGGTTCGATGGCCA  
 GAGGAGAGTTACAATTAGCTGGTCTTGTGAGATCATCCGGAGTGCCTTATTCTAAGAACCAGGAGATAGAGT  
 CTTTAGAGCAGTTTTCATATGGCGACGGCAGATTGCTTAATTCGTAAGCAGATGAGCTCGATTGTGTACACGGGTC  
 CGATTAAAGTTCAGCAAATGAAAACTTTATCGATAGCCTGGTAGCATCACTATCTGCTGCGGTGTGCAATCTCG  
 TCAAGATCCTCAAAGATACAGCTGCTATTGACCTTGAACCCGTCAAAAGTTTGGAGTCTTGGATGTTGCATCTA  
 GGAAGTGGTTAATCAAACCAACGGCCAAGAGTCATGCATGGGGTGTGTTGAAACCCACGCGAGGAAGTATCATG  
 TGGCGCTTTTGGAAATGATGAGCAGGGTGTGGTGCATGCGATGATTGGAGAAGAGTAGCTGTTAGCTCTGAGT  
 CTGTTGTTTTATTCCGACATGGCGAAACTCAGAACCTGCGCAGACTGCTTCGAAACGGAGAACCAGCATGTCAGTA  
 CGCGAAAAGTTGTTCTTGTGGACGGAGTTCCGGGCTGTGGAAAAACCAAAGAAATCTTTCCAGGGTTAATTTTG  
 ATGAAGATCTAATTTTTAGTACCTGGGAAGCAAGCCGCGGAAATGATCAGAAGACGTGCGAATTCCTCAGGGATTA  
 TTGTGGCCACGAAGGACAACGTTAAAACCGTTGATTCTTTTCATGATGAATTTTTGGGAAAAACACACGCTGTGAGT  
 TCAAGAGGTTATTTCATTGATGAAGGGTTGATGTTGCATACTGGTTGTGTTAATTTTTCTTGTGGCGATGTCATTGT  
 GCGAAATTGCATATGTTTACGGAGACACACAGCAGATTCCATACATCAATAGAGTTTCCAGGATTCCTGATACCCCG  
 CCCATTTTGCCAAATTTGAAGTTGACGAGGTGGAGACACGCAGAACTACTCTCCGTTGTCCAGCCGATGTCACAC  
 ATTATCTGAACAGGAGATATGAGGGCTTTGTCATGAGCACTTCTTCCGTTAAAAGTCTGTTTTCGAGGAGATGG  
 TCGGCGGAGCCCGCTGATCAATCCGATCTCAAACCCCTTGCATGGCAAGATCCTGACTTTTACCCAATCGGATA  
 AAGAAGCTCTGCTTTCAAGAGGGTATTTCAGATGTTTCACTGTGCATGAAGTGAAGGCGAGACATACTCTGATG  
 TTTCACTAGTTAGGTTAACCCCTACACCGGTCTCCATCATTGCAGGAGACAGCCACATGTTTTGGTGCATTTGT  
 CAAGGCACACCTGTTCCGCTCAAGTACTACACTGTTGTTATGGATCCTTTAGTTAGTATCATTAGAGATCTAGAGA  
 AACTTAGCTCGTACTTGTAGATATGTATAAGGTCGATGCAGGAACACAATAGCAATTACAGATTGACTCGGTGT  
 TCAAAGGTTCCAATCTTTTTGTTGCGAGCCAAAGACTGGTGATATTTCTGATATGCAGTTTTACTATGATAAGT  
 GTCTCCAGGCAACAGCACCATGATGAATAATTTTGTGCTGTTACCATGAGGTTGACTGACATTTCAATTGAATG  
 TCAAAGATTGCATATTGGATATGTCTAAGTCTGTTGCTGCGCCTAAGGATCAAATCAAACCCTAATACCTATGG  
 TACGAACGGCGGCAGAAATGCCACGCCAGACTGGACTATTGAAAAATTTAGTGGCGATGATTAAGAAACTTTA

ACGCACCCGAGTTGTCTGGCATCATTGATATTGAAAATACTGCATCTTTGGTTGTAGATAAGTTTTTTGATAGTT  
ATTTGCTTAAAGAAAAAGAAAACCAAATAAAAAATGTTTCTTTGTTTCAGTAGAGAGTCTCTCAATAGATGGTTAG  
AAAAGCAGGAACAGGTAACAATAGGCCAGCTCGCAGATTTTGGATTTTGTGGATTTGCCAGCAGTTGATCAGTACA  
GACACATGATTAAAGCACAACCCAAAACAAAAGTTGGACACTTCAATCCAAACGGAGTACCCGGCTTTGCGAGCGA  
TTGTGTACCATTCAAAAAAGATCAATGCAATATTCGGCCCCGTTGTTTAGTGAGCTTACTAGGCAATTAAGTGGACA  
GTGTTGATTTCGAGCAGATTTTGTGTTTTTACAAGAAAGACACCAGCGCAGATTGAGGATTTCTTCGGAGATCTCG  
ACAGTCATGTGCCGATGGATGTCTTGGAGCTGGATATATCAAAAATACGACAAAATCTCAGAATGAATCCACTGTG  
CAGTAGAATACGAGATCTGGCGAAGATTGGGTTTTGAAGACTTCTTGGGAGAAGTTTGAAACAAGGGCATAGAA  
AGACCACCCTCAAGGATTATACCCGAGGTATAAAAAACTTGCATCTGGTATCAAAGAAAGAGCGGGGACGTCACGA  
CGTTCATTGGAAACACTGTGATCATTGCTGCATGTTTGGCCTCGATGCTTCCGATGGAGAAAAAATCAAAGGAG  
CCTTTTTCGGTGACGATAGTCTGCTGTACTTTCCAAAGGGTTGTGAGTTTCCGGATGTGCAACACTCCGCAAATC  
TTATGTGGAATTTTGAAGCAAACACTGTTTAAAAAACAGTATGGATACTTTTTCGGAAAGATATGTAATACATCAG  
ACAGAGGATGCATTGTGTATTACGATCCCTAAAAGTTGATCTCGAAACTTGGTGCTAAAACACATCAAGGATTGGG  
AACACTTGGAGGAGTTCAGAAGGTCTCTTTGTGATGTTGCTGTTTCGTTGAAACAATTGTGCGTATTACACACAGT  
TGGACGACGCTGTATGGGAGGTTTATAAGACCCGCCCTCCAGGTTTCGTTTGTGTTATAAAAAGTCTGGTGAAGTATT  
TGTCTGATAAAGTTCTTTTTAGAAAGTTTGTGTTATAGATGGCTCTAGTTGTTAAAGGAAAAGTGAATATCAATGAG  
TTTATCGACCTGTCAAAAATGGAGAAGATCTTACCGTCGATGTTTACCCTGTAAAGAGTGTATGTGTTCCAAA  
GTTGATAAAATAATGGTTCATGAGAATGAGTCATTGTCAGAGGTGAACCTTCTTAAAGGAGTTAAGCTTATTGAT  
AGTGGATACGTCGTTTAGCCGGTTTTGGTTCGTCACGGGCGAGTGAACCTTGCCTGACAATTCAGAGGAGGTGTG  
AGCGTGTGTCTGGTGGACAAAAGGATGGAAAGAGCCGACGAGGCCACTCTCGGATCTTACTACACAGCAGCTGCA  
AAGAAAAGATTTTCAGTTCAAGGTGCTTCCCAATTATGCTATAACCACCCAGGACGCGATGAAAAACGTCCTGGCAA  
GTTTTAGTTAATATTAGAAATGTGAAGATGTCAGCGGGTTTTCTGTCCGCTTTCTCTGGAGTTTGTGTCGGTGTGT  
ATTTGTTTATAGAAATAATATAAAATTAGGTTTTGAGAGAGAAGATTACAAACGTGAGAGACGGAGGGCCCATGGAA  
CTTACAGAAGAAGTCGTTGATGAGTTCATGGAAGATGTCCCTATGTCGATCAGGCTTGCAAAGTTTCGATCTCGA  
ACCGGAAAAAAGAGTGTATGTCGCAAAAGGGAAAAATAGTAGTAGTATGATCGGTGAGTCCGGAACAAGACTATAGA  
AATGTTAAGGATTTTGGAGGAATGAGTTTTTAAAAAAGATAAATTAATCGATGATGATTCGGAGGCTACTGTGCGCC  
CAATCGGATTCGTTTTAAATATGTCTTACAGTACTACTCCATCCATCTCAGTTCGTTGTTGTCATCAGCTGGGG  
CCGACCCAATAGAGTTAATTAATTTATGTACTAATGCCTTAGGAAATCAGTTTCAAACACAACAAGCTCGAACTG  
TCGTTCAAAGACAATTCAGTGAGGTGTGGAAACCTTACCACAAGTAAGTGTAGGTTCCCTGACAGTGACTTTA  
AGGTGTACAGGTACAATGCGGTATTAGACCCGCTAGTCACAGCACTGTTAGGTGCATTCGACACTAGAAAATAGAA  
TAATAGAAGTTGAAAATCAGGCGAACCCACGACTGCCGAGACGTTAGATGCTACTCGTAGAGTAGACGACGCAA  
CGGTGGCCATAAGGAGCGCGATAAATAATTTAATAGTAGAATTGATCAGAGGAACCGGATCTTATAATCGGAGCT  
CTTTTCGAGAGCTCTTCTGGTTTTGGTTTTGGACCTCTGGTCTGCAACTTGAAGTAGTCAAGATGCATAATAAATAA  
CGGATTGTGTCCGTAATCACACGTGGTGCGTACGATAACGCATAGTGTTTTTCCCTCCACTTAAATCGAAGGGTT  
GTGTCTTGGATCGCGCGGGTCAAATGTATATGTTTCATATACATCCGACGGCAGTAATAAAGCGAGGGGTTCGA  
ATCCCCCGTTACCCCCGGTAGGGGCCAAGGGTCGGCATGGCATCTCCACCTCCTCGCGGTCCGACCTGGGCTAC  
TTCGGTAGGCTAAGGGAGAAGCGCTGAAATCACCAGTCTCTCTCTACAAATCTATCTCTCTATTTTCTCCATA  
AATAATGTGTGAGTAGTTTTCCCGATAAGGGAAATTAGGGTTCTTATAGGGTTTTCGCTCATGTGTTGAGCATATAA  
GAAACCTTAGTATGATTTTGTATTTGTAAAATACTTCTATCAATAAAAATTTCTAATTCCTAAAACCAAATCCA  
GGGGCCCTCGACGTTTCTTGGACAGGATATATTGGCGGGTAAACTAAGTCCCTGTATGTGTTTGTGAGATCCTC  
TAGGGCATGCAAGCTGATCTGGATCTCATGTGAGCAAAAGGCCAGCAAAAGGCCAGGAACCGTAAAAAGGCCGCG  
TTGCTGGCGTTTTCATAGGCTCCGCCCCCTGACGAGCATCAAAAAATCGACGCTCAAGTCAGAGGTGGCGA  
AACCCGACAGGACTATAAAGATACCCAGGCGTTTTCCCCCTGGAAGCTCCCTCGTGCCTCTCTGTTCCGACCCGT  
CCGCTTACCGGATACCTGTCCGCTTTCTCCCTTCGGGAAGCTGGCGCTTTCTCATAGCTCAGCTGTAGGTAT  
CTCAGTTCCGGTGTAGGTCGTTCCGCTCCAAGCTGGGCTGTGTGACGCAACCCCCGTTTCAGCCCCAGCCGTCGCGC  
TTATCCGGTAACTATCGTCTTGGTCCAACCCGGTAAGACACGACTTATCGCCACTGGCAGCAGCCACTGGTAAC  
AGGATTAGCAGAGCGAGGTATGTAGGCGGTGCTACAGAGTTCTTGAAGTGGTGGCCTAACTACGGCTACACTAGA  
AGAACAGTATTTGGTATCTGCGCTCTGCTGAAGCCAGTTACCTTCGGAAGAAGAGTTGGTAGCTCTTGATCCGGC  
AAACAAACCACCGCTGGTAGCGGTGGTTTTTTTTGTTTGAAGCAGCAGATTACGCGCAGAAAAAAGGATCTCAA  
GAAGATCCTTTGATCTTTTCTACGGGGTCTGACGCTCAGTGAACGAAAACCTCACGTTAAGGGATTTTGGTCATG  
AGATTATCAAAAAGGATCTTACCTAGATCCTTTTAAATTAAAAATGAAGTTTAAATCAATCTAAAGTATATAT  
GTGTAACATTGGTCTAGTGAATTAGAAAAACTCATCGAGCATCAAATGAACTGCAATTTATTTCATATCAGGATTA  
TCAATACCATATTTTTGAAAAGCCGTTTTCTGTAATGAAGGAGAAAACCTCACCGAGGCAGTTCCATAGGATGGCA  
AGATCCTGGTATCGGTCTGCGATTCCGACTCGTCCAACATCAATACAACCTATTAATTTCCCTCGTCAAAAAATA  
AGGTTATCAAGTGAGAAAATCACCATGAGTGACGACTGAATCCGGTGAAGTGGCAAAAAGTTTATGCATTTCTTTT  
CAGACTTGTTC AACAGGCCAGCCATTACGCTCGTTCATCAAAAATCACTCGCATCAACCAAACCGTTATTTCATTGGT  
GATTGCGCCTGAGCAAGACGAAAATACCGGATCGCTGTTAAAAGGACAATTAACAAACAGGAATCGAATGCAACCGG  
CGCAGGAACACTGCCAGCGCATCAACAATATTTTACCTGAATCAGGATATTTCTTCTAATACCTGGAATGCTGTT  
TTCCCTGGGATCGCAGTGGTGAAGTAAACATGCATCATCAGGAGTACGGATAAAAATGCTTGTGATGGTCCGAAGAGGC  
ATAAATTCGTCAGCCAGTTTAGTCTGACCATCTCATCTGTAACAACATTTGGCAACGCTACCTTTGCCATGTTTC  
AGAAACAACCTCTGGCGCATCGGGCTTCCCATACAATCGGTAGATTGTGCGACCTGATTGCCCGACATTATCGCGA

**GCCCATTATACCCATATAAATCAGCATCCATGTTGGAATTTAATCGCGGCCCTTGAGCAAGACGTTTCCCGTTG**  
**ATATGGCTCAT**AACACCCCTTGTATTACTGTTTATGTAAGCAGACAGTTTTATTGTTTCATGATGATATATTTTTA  
TCTTGTGCAATGTAACATCAGAGATTTTTGAGACACAACGTGGCTTTGTTGAATAAATCGAACTTTTTGCTGAGTTG  
AAGGATCAGATCACGCATCTTCCCACAAACGCAGACCGTTCCCGTGGCAAAGCAAAAAGTTCAAAAATCACCAACTGG  
TCCACCTACAACAAAGCTCTCATCAACCGTGGCTCCCTCACTTTCTGGCTGGATGATGGGGCGATT**CAGGC**GATC  
CCCATCCAACAGCCCGCGTTCGAGCGGGCTTTTTTATCCCCGGAAGCCTGTGGATAGAGGGTAGTTATCCACGTG  
AAACCGCTAATGCCCGCAAAGCCTTGATTCACGGGGCTTTCCGGCCCGCTCCAAAACTATCCACGTGAAATCG  
CTAATCAGGGTACGTGAAATCGCTAATCGGAGTACGTGAAATCGCTAATAAGGTCACGTGAAATCGCTAATCAAA  
AAGGCAGTGAGAACGCTAATAGCCCTTTCAGATCAACAGCTTGCAAACACCCCTCGCTCCGGCAAGTAGTTACA  
GCAAGTAGTATGTTCAATTAGCTTTTCAATTATGAATATATATATCAATTATTGGTCGCCCTTGGCTTGTGGACA  
ATGCGCTACGCGCACCGGCTCCGCCCGTGGACAACCGCAAGCGGTTGCCACCGTCGAGCGCCTTTGCCACAAC  
CCGGCGGCCGGCCGCAACAGATCGTTTTATAAATTTTTTTTTTTTGA AAAAGAAAAAGCCCGAAAGGCGGCAACCT  
CTCGGGCTTCTGGATTTCCGATCCCGGAATTAGATCCGTTTAAACTACGTAAGATCGATCT**FGGCAGGATATA**  
**TGTGCTATAAC**GTTTCTGCGGCGGTCGAGATGGATCT**FGGCAGGATATAATTGTGGTATAAC**GTTCTT

**TMV-MK087763** is in bold. **Cauliflower mosaic virus (CaMV) 35S promoter** is in red with the transcription **+1** nucleotide on yellow background. **Hepatitis delta virus (HDV)-derived ribozyme** is in red. **CaMV 35S terminator** is in fuchsia with the processing and polyadenylation site underlined. *E. coli* **pUC replication origin** is in blue on gray background. **Kanamycin** selection marker is in blue on dark gray background (complementary strand). *A. tumefaciens* **pSa replication origin** is in blue on gray background. *A. tumefaciens* T-DNA **RB** with **overdrive** (underlined) is in blue on yellow background and **double LB** is in blue on red background.

>pMTMVi-N (2376 bp)

**AAGATTACAAACGTGAGAGACGGAGGGCCCATGGA**ACTTACAGAAGAAGTCGTTGATGAGTTCATGGAAGATGTC  
**CCTATGT**CGATCAGGCTTGC**AAAGTTTCGATCTCGA**ACCGGAAAAAAGAGTGATGTCCGCAAAGGGAAAAATAGT  
**AGTAGT**GATCGGTCAGTGCCGAACAAGAACTATAGAAATGTTAAGGATTTTGGAGGAATGAGTTTTAAAAAGAA  
**AATTTAAT**CGATGATGATT**CGGAGGCTACTGT**CGCCGAATCGGATTCGTTT**TAAATA**GATCTTACAGTATCACTA  
**CTCCATCTCAGTT**CGTGT**CTTTGTCA**ACCGGT**GAAAGCGGGCAGT**GAGCGCAACGCAATTAATGTGAGTTAGCTCA  
**CTCATTAGG**CAACCCAGGCTTTACACTTTATGCTCCCGCTCGTATGTTGTGTGGAATTTGAGCGGATAACAAT  
**TTCACACAGG**AAACAGCTATGACCATGATTACGCCAAGCGCGCAATTAACCTCACTAAAGGGAACAAAAGCTGG  
**GTACCCAATT**CGCCCTATAGTGAGTCGTATTACGCGCGCTCACTGGCCGTGTTTTACAACGTCGTGACTGGGAA  
**AACCTTGG**CGTTACCCA**ACTTAATCGCCTTGC**AGCACATCCCCCTTTCGCCAGCTGGCGTAATAGCGAAGAGGCC  
**CGCACCGAT**CGCCCTTCCCAACAGTTGCGCAGCCTGAATGGCGAATGGGACCGC**CTCGAG**GTCTCGCAACT**TGAG**  
**GTAGTCAAGATGCATAATAAATAACGGATTGTGT**CCGTAATCACACGTGGT**GCCTACG**GATAACGCATAGT**GTTTT**  
**TCCCTCCACTT**G**GAGACC**GCCTTGGCTGGCGT**TTTTCC**ATAGGCTCCGCCCCCTGACGAGCATCACAAAAATCGA  
CGCTCAAGTCAGAGGTGGCGAAACCCGACAGGACTATAAAGATACCAGGCGTTTCCCCTGGAAAGCTCCCTCGTG  
CGCTCTCCTGTTCCGACCCTGCCGCTTACCGGATACCTGTCCGCCTTCTCCCTTCGGGAAGCGTGGCGCTTTCT  
CATAGCTCACGCTGTAGGTATCTCAGTTCGGTGTAGGTGTTGCTCCAAAGCTGGGCTGTGTGCACGAACCCCC  
GTTACAGCCGACCGCTGCGCCTTATCCGGTAACATATCGTCTTGAGTCCAACCCGGTAAGACACGACTTATCGCCA  
CTGGCAGCAGCCACTGGTAACAGGATTAGCAGAGCGAGGTATGTAGGCGGTGCTACAGAGTCTTGAAGTGGTGG  
CCTAACTACGGCTACACTAGAAGGACAGTATTTGGTATCTGCGCTCTGCTGAAGCCAGTTACCTTCGGAAAAAGA  
GTTGGTAGCTCTTGATCCGGCAAACAAACCACCGCTGGTAGCGGTGGTTTTTTTTGTTTTGCAAGCAGCAGATTACG  
CGCAGAAAAAAGGATCTCAAGAAGATCCTTT**TTACCAAT**GCCTTAATCAGTGAGGCACCTATCTCAGCGATCTGT  
CTATTT**CGTT**CATCCATAGTTGCCTGACTCCCCGTCGTGTAGATAACTACGATACGGGAGGGCTTACCATCTGGC  
CCCAGTGTGCAATGATACCGCGAGAGCCACGCTCACCGGCTCCAGATTTATCAGCAATAAACCAGCCAGCCGGA  
AGGGCCGAGCGCAGAAGTGGTCTGCAACTTTATCCGCCTCCATCCAGTCTATTAATTGTTGCCGGGAAGCTAGA  
GTAAGTAGTTCGCCAGTTAATAGTTTGC**GCAACGTTGTT**GCCATTGCTACAGGCATCGTGGTGTACGCTCGTCCG  
TTTGGTATGGCTT**CATT**CAGCTCCGGTCCCAACGATCAAGGCGAGTTACATGATCCCCCATGTTGTGCAAAAA  
GCGGTTAGCTCCTTCGGTCTCCGATCGTTGT**CAGAAGTAAGTTG**CCCGCAGTGTATCACTCATGGTTATGGCA  
GCACTGCATAATTCTTACTGT**CATGCCATCCGTAAGATGCT**TTTTCTGTGACTGGTGAGTACTCAACCAAGTCA  
TTCTGAGAATAGTGTATGCGGCGACCGAGTTGCTCTTGGCCGGCGTCAATACGGGATAATACCGCGCCACATAGC  
AGA**ACTTTAA**AGTGCTC**ATCATTGG**AAAACGTTCTTCCGGGGCGAAAACTCTCAAGGATCTTACCGCTGTTGAGA  
TCCAGTTCGATGTAACCCACTCGTGCACCCA**ACTGATCTT**CAGCATCTTTACTTTACCAGCGTTCTGGGTGA  
GCAAAAACAGGAAGGCAAAATGCCGCAAAAAAGGGAATAAGGGCGACACGGAAATGTTGAATACTCATACTCTTC  
CTTTTTCAATATTATTGAAGCATTATCAGGGTATTGTCTCAT**GGTCTC**G

TMV-MK087763 genome fragment is in bold. The ATG to AGA mutation of the TMV CP initiation codon is indicated. Unique restriction sites *NcoI* and *Pfl23II* are on green background. A polylinker is inserted between TMV positions 5756 and 6177. The polylinker consists of two unique restriction sites *AgeI* and *XhoI* (yellow background) separated by a blue-white *LacZ* marker (in blue and italics). Two *BsaI* recognition sites to release the TMV fragment, once manipulated, are indicated on blue background. Hybridization sites for PI and PII oligonucleotides to alternatively produce the manipulated TMV fragment by PCR are doubly underlined. Plasmid also contains pUC replication origin (in gray) and ampicillin resistance marker (on gray background).

>pMTMVi-M (3373 bp)

**AAGATTACAAACGTGAGAGACGGAGGGCCCATGGA**ACTTACAGAAGAAGTCGTTGATGAGTTCATGGAAGATGTC  
CCTATGTGCGATCAGGCTTGCAAAGTTTCGATCTCGAACCAGGAAAAAGAGTGATGTCCGCAAAGGGAAAAATAGT  
AGTAGTGATCGGTCAGTGCCGAACAAGAAGTATAGAAATGTTAAGGATTTTGGAGGAATGAGTTTAAAAAGAAT  
AATTTAATCGATGATGATTCGGAGGCTACTGTGCGCGAATCGGATTCGTTT**TAAATAGATCTTACAGTATCACTA**  
**CTCCATCTCAGTTTCGTGTTCTTGTCA**ACCGGTGAAAGCGGGCAGTGAGCGCAACGCAATTAATGTGAGTTAGCTCA  
CTCATTAGGCACCCAGGCTTTACACTTTATGCTCCCGCTCGTATGTTGTGGAATTTGAGCGGATAACAAT  
TTACACAGGAAACAGCTATGACCATGATTACGCCAAGCGCGCAATTAACCTCACTAAAGGGAACAAAAGCTGG  
GTACCCAATTCGCCCTATAGTGAGTCGTATTACGCGCGCTCACTGGCCGTCGTTTTACAACGTCGTGACTGGGAA  
AACCTGGCGTTACCCAACCTAATCGCCTTGCAGCACATCCCCCTTTCCGCAGCTGGCGTAATAGCGAAGAGGCC  
CGCACCGATCGCCCTTCCAACAGTTGCGCAGCCTGAATGGCGAATGGGACCGCTCGAGGTCTCTGCAACTTGAG  
GTAGTCAAGATGCATAATAAATAACGGATTGTGTCCGTAATCACACGTGGTGCGTACGATAACGCATAGTGTTTT  
TCCCTCCACTTAAATCGAAGGTTGTGTCTTGGATCGCGGGTCAAATGTATATGGTTCATATACATCCGCAGG  
CACGTAATAAAGCGAGGGTTTCGGAACCAAATCCTCAAAAAGAGGTCGAAAAATAATAATAATTTAGGTAAGGG  
GCGTTTCAGGCGGAAGGCCTAAACCAAAAAGTTTTGATGAAGTTGAAAAAGAGTTTGATAAATTTGATGAAGATGA  
AGCCGAGACGTCGGTCGCGGATTCTGATTCTATTAAAT**ATG**TCTTACTCAATCACTTCTCCATCGCAATTTGTG  
TTTTTGTATCTGTATGGGCTGACCCTATAGAATTGTTAAACGTTTGTACAAATTCGTTAGGTAACCAGTTTCAA  
ACACAGCAAGCAAGAAGTACTGTTCAACAGCAGTTCAGCGAGGTGTGGAAACCTTTCCCTCAGAGCACCAGTCCAG  
TTTCCCTGGCGATGTTTATAAGGTGTACAGGTACAATGCAGTTTTAGATCCTCTAATTAAGTGGTGGGGTCT  
TTCGATACTAGGAATAGAATAATCGAAGTAGAAAACCAGCAGAATCCGACAACAGCTGAAACGTTAGATGCTACC  
CGCAGGGTAGACGACGCTACGGTTGCAATTCGGTCTGCTATAATAATTTAGTAAATGAAGTAAAGAGTACT  
GGACTGTACAATCAAATACTTTTTGAAAGTATGTCTGGGTTGGTCTGGACCTCTGCACCTGCATCT**TAAATGCAT**  
**AGGTGCTGAAATATAAAGTTTTGTGTTCTAAAACACACGTGGTACGTACGATAACGTATAGTGT**TTTTCCCTCCA  
**CTTAAATCGAAAGGGTAGTGTCTTGGAGCGCGGAGTAAACATATATGGTTCATATATGTCCTAGCAGCTAA**  
**AAAGCGAGGGATTGCAATTCCTCCCGGAACCCCGGGTTGGGGCCCA**GGGTCGGCATGGCATCTCCACCTCCTCG  
GGTCCACCTGGGCTACTTCGGTAGGCTAAGGGGGAGACCGCGTTGCTGGCGTTTTTCCATAGGCTCCGCCCCCT  
TGACGAGCATCACAAAAATCGACGCTCAAGTCAGAGGTGGCGAAACCCGACAGGACTATAAAGATACCAGGCGTT  
TCCCCCTGGAAGCTCCCTCGTGGCGCTCTCCTGTTCCGACCCTGCCGCTTACCGGATACCTGTCCGCCTTTCTCCC  
TTCGGGAAGCGTGGCGCTTTCTCATAGCTCACGCTGTAGGTATCTCAGTTCGGTGTAGGTCGTTCCGCTCCAAGCT  
GGGCTGTGTGCACGAACCCCGTTCCAGCCGACCCGCTGCGCCTTATCCGGTAACATATCGTCTTGAGTCCAACCC  
GGTAAGACACGACTTATCGCCACTGGCAGCAGCCACTGTTAACAAGGATTAGCAGAGCGAGGATGTAGGCGGTGC  
TACAGAGTTCTGAAGTGGTGGCCCTAACTACGGCTACACTAGAAGGACAGTATTTGGTATCTGCGCTCTGCTGAA  
GCCAGTTACCTTCGAAAAAGAGTTGGTAGCTCTTGATCCGGCAAACAAACCACCGTGGTAGCGGTGGTTTTTT  
TGTTTTGCAAGCAGCAGATTACGCGCAGAAAAAAGGATCTCAAGAAGATCCTTTT**TACCAATGCTTAATCAGTGA**  
**GGCACCTATCTCAGCGATCTGTCTATTTTCGTTTCATCCATAGTTGCCTGACTCCCCGTCGTGTAGATAACTACGAT**  
**ACGGGAGGGCTTACCATCTGGCCCCAGTGTGCAATGATACCGCGAGAGCCACGCTCACCGGCTCCAGATTTATC**  
**AGCAATAAACCAGCCAGCCGGAAGGGCCGAGCGCAGAAGTGGTCTGCAACTTATCCGCCTCCATCCAGTCTAT**  
**TAATTGTTGCCGGGAAGCTAGAGTAAGTAGTTCGCCAGTAAATAGTTTGCACAACGTTGTGCCATTGCTACAGG**  
**CATCGTGGTGTACGCTCGTCTGTTTGGTATGGCTTCATTCAGCTCCGGTCCCAACGATCAAGGCGAGTTACATG**  
**ATCCCCATGTTGTGCAAAAAGCGGTTAGCTCCTTCGGTCTCCGATCGTTGTCAGAAGTAAGTTGGCCGAGT**  
**GTTATCACTCATGGTTATGGCAGCACTGCATAATCTCTTACTGTGTCATGCCATCCGTAAGATGCTTTTCTGTGAC**  
**TGGTGAGTACTCAACCAAGTCATTCTGAGAATAGTGTATGCGGCGACCGAGTTGCTCTTGCCCGCGTCAATACG**  
**GGATAATACCGCGCCACATAGCAGAACCTTTAAAAGTGTCTCATATTGGAAAACGTTCTTCCGGGGCGAAAACCTC**  
**AAGGATCTTACCGCTGTTGAGATCCAGTTCGATGTAACCCACTCGTGCACCCAACCTGATCTTCAGCATCTTTTAC**  
**TTTACCAGCGTTTCTGGGTGAGCAAAAACAGGAAGGCAAAATGCCGAAAAAAGGGAATAAGGGCGACACGGAA**  
**ATGTTGAATACTCATACTCTTCTTTTTCAATATTATTGAAGCATTATCAGGGTTATTGTCTCAT**GGTCTCGG

TMV-MK087763 genome fragment is in bold. The ATG to AGA mutation of the TMV CP initiation codon is indicated. Unique restriction sites *NcoI*, *Pfl23II* and *CpoI* are on green

background. A polylinker is inserted between TMV positions 5756 and 6177. The polylinker consists of two unique restriction sites **AgeI** and **XhoI** (yellow background) separated by a blue-white *LacZ* marker (in blue and italics). 3' fragment of tomato mosaic virus (ToMV) genome (CP promoter, CP ORF and 3' UTR) is on gray background (**transcription initiation** and **start** and **stop** codons are indicated). **HDV-derived ribozyme** is in red. Two **BsaI** recognition sites to release the manipulated TMV fragment are indicated on blue background. Hybridization sites for PI and PIII oligonucleotides to alternatively produce the manipulated TMV fragment by PCR are doubly underlined. Plasmid also contains pUC replication origin (in gray) and ampicillin resistance marker (on gray background).



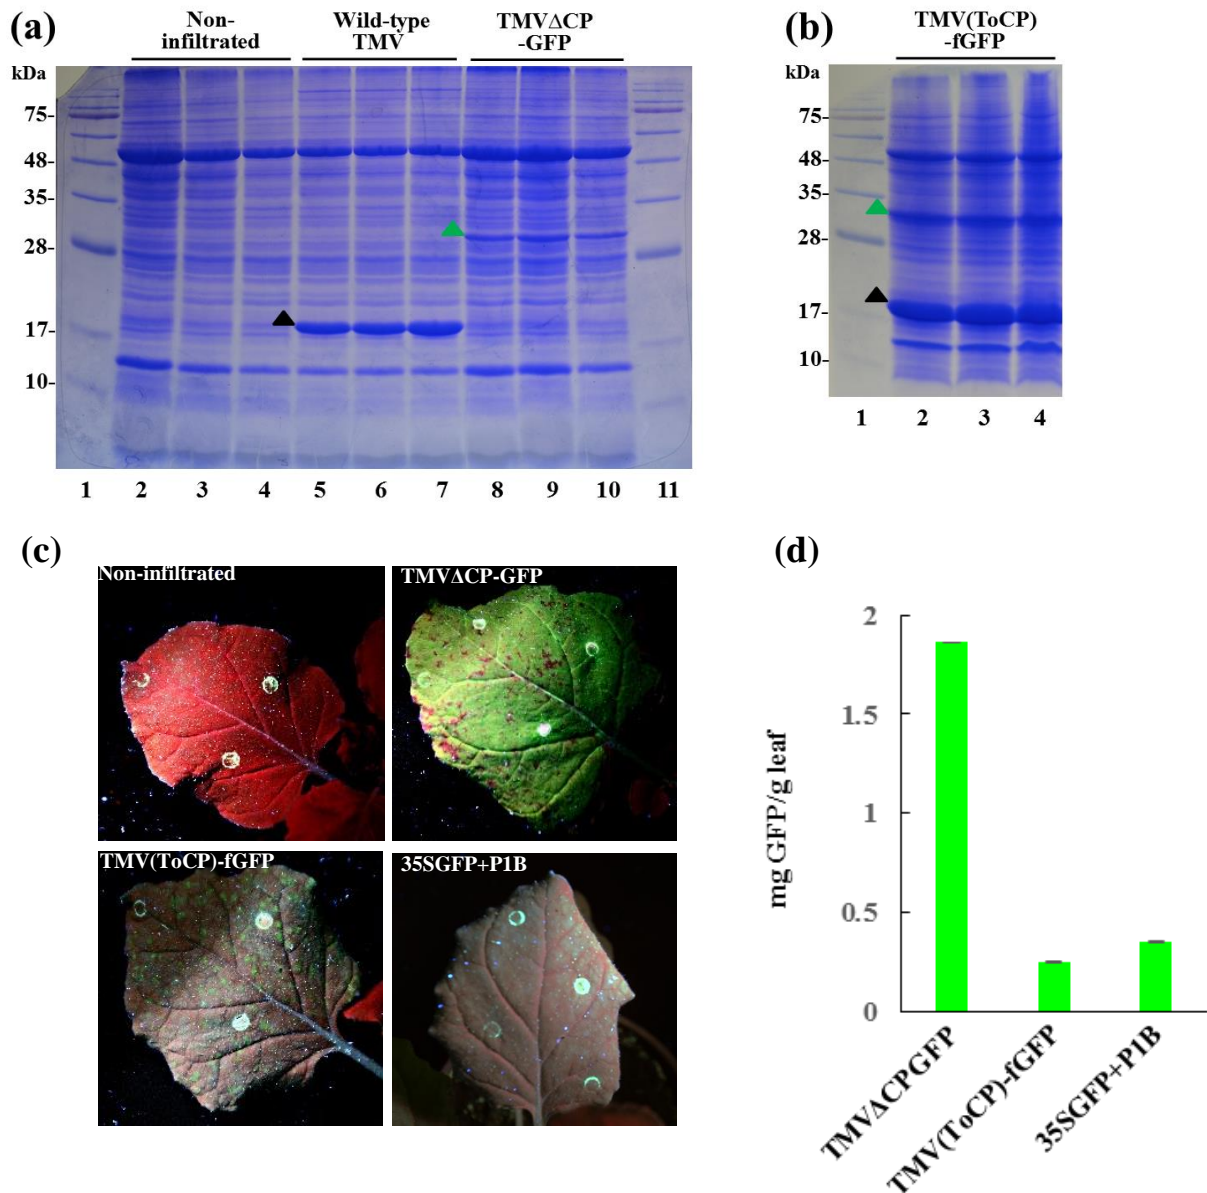

**Figure S3.** Analysis of GFP produced in *N. benthamiana* plants using the TMV vector system. Total proteins from plant leaves were separated by SDS-PAGE in 12.5% polyacrylamide gels and stained with Coomassie blue. (a) Lanes 1 and 11, and (b) lane 1, marker proteins with the sizes in kDa on the left. (a) Proteins from tissues of three independent plants non-infiltrated (lanes 2 to 4), or infiltrated with wild-type TMV (lanes 5 to 7) or TMV $\Delta$ CP-GFP (lanes 8 to 10). Tissues were collected 7 dpi. (b) Proteins from upper non-inoculated tissues from three independent plants agroinoculated with TMV(ToCP)-fGFP (lanes 2 to 4). Tissues were collected 13 dpi. Green and black arrowheads points to GFP and TMV CP. (c) Appearance of *N. benthamiana* leaves agroinfiltrated with the indicated TMV vectors, or the binary vector pGWB5 along with the silencing suppressor P1b from *Cucumber vein yellowing virus* (CMYV) at 7 dpi under UV light. (d) Comparative analysis of GFP production in the agroinfiltrated leaves with the two viral vectors and a simple 35S promoter using the P1b silencing suppressor at 7 dpi.



**Figure S4.** Sequence of TMV-derived recombinant viruses TMV $\Delta$ CP-GFP, TMV $\Delta$ CP-AfpB, TMV $\Delta$ CP-AfpBKDEL, TMV $\Delta$ CP-UP, TMV $\Delta$ CP-UPKDEL, TMV $\Delta$ CP-UPVS, TMV $\Delta$ CP-AgAFP and TMV(ToCP)-fGFP.

>TMV (with the ATG to AGA mutation of CP start codon)

```

GTATTTTTTACAACAATTACCAACAACAACAACAACAACAACAACAATTACAATTACTATTTACAATTACAATGGCAT
ACACACAGACAGCTACCACATCAGCTTTGCTGGACACTGTCCGAGGAAACAACCTCCTTGGTCAATGATCTAGCAA
AGCGTCGTCTTTACGACACAGCGGTTGAAGAGTTAACGCTCGTGACCGCAGGCCCAAGGTGAACCTTTCAAAG
TAATAAGCGAGGAGCAGACGCTTATTGCTACCCGGGCGTATCCAGAATTCCAATTACATTTTATAACACGCAAA
ATGCCGTGCATTTCGCTTGCAGGTGGATTGCGATCTTTAGAAGTGGAAATATCTGATGATGCAAAATTCCTACGGAT
CATTGACTTATGACATAGGCGGGAATTTTGCATCGCATCTGTTCAAGGGACGAGCATATGTACACTGCTGCATGC
CCAACCTGGACGTTTCGAGACATCATGCGGCACGAAGGCCAGAAAGACAGTATTGAACTATACTTTCTAGGCTAG
AGAGAGGGGGGAAAACAGTCCCAACTTCCAAAAGGAAGCATTGTACAGATACGCAGAAATTCCTGAAGACGCTG
TCTGTCAACAATACTTTCCAGACATGCGAACATCAGCCGATGCAGCAATCAGGCAGAGTGTATGCCATTGCGCTAC
ACAGCATATATGACATAACCAGCCGATGAGTTCCGGGGCGGCACTCTTGAGGAAAAATGTCCATACGTGCTATGCCG
CTTTCCACTTCTCCGAGAACCTGCTTCTTGAAGATTTCATGCGTCAATTTGGACGAAATCAACCGGTGTTTTTCGC
GCGATGGAGACAAGTTGACCTTTTTCTTTTGCATCAGAGAGTACTCTTAATTACTGTCATAGTTATTTCTAATATTC
TTAAGTATGTGTGCAAACTTACTTCCCAGGCTCTAATAGAGAGGTTTACATGAAGGAGTTTTTTAGTCACCAGAG
TTAATACCTGGTTTTGTAAAGTTTTCTAGAATAGATACTTTTCTTTTGTACAAAAGGTGTGGCCATAAAAAGTGTA
ATAGTGAGCAGTTTTTATACTGCAATGGAAGACGCATGGCATTACAAAAGACTCTTGCAATGTGCAACAGCGAGA
GAATCCTCCTTGAGGATTCATCATCAGTCAATTACTGGTTTTCCAAAATGAGGGATATGGTCATCGTACCATTAT
TCGACATTTCTTTGGAGACTAGTAAGAGGACGCGCAAGGAAGTCTTAGTGTCCAAGGATTTTCGTGTTTACAGTGC
TTAACCATTCGAACATAACCAGGCGAAAGCTTACATACGCAAAATGTTTTGTCTTCGTGCAATCGATTTCGAT
CGAGGGTAATCATTAAACGGTGTGACAGCGAGGTCGAATGGGATGTGGACAAAATCTTTGTACAATCTTTGTCCA
TGACGTTTTTACCTGCATACTAAGCTTGGCGTTCTAAAGGATGACTTACTGATTAGCAAGTTTACTGTCGTTTTCGA
AAACGGTGTGCCAGCATGTGTGGGATGAGATTTTCGCTGGCGTTTTGGGAACGCATTTCCCTCCGTGAAAGAGAGGC
TCTTGAACAGGAACTTATCAGAGTGGCAGGCGACGCATTAGAGATCAGGGTGCCTGATCTATATGTGACCTTCC
ACGACAGATTAGTGACTGAGTACAAGGCCTCTGTGGACATGCCTGCGCTTGCATTAGGAAGAAGATGGAAGAAA
CGGAAGTGATGTACAATGCATTTTCAGAATTATCGGTGTTAAGGGAGTCTGACAAAATTCGATGTTGATGTTTTTT
CCCAGATGTGCCAATCTTTGGAAGTTGACCCAATGACGGCAGCGAAGGTTATAGTCGCGGTTCATGAGCAATGAGA
GCGGTCTGACTCTCACATTTGAACGACCTACTGAGGCGAATGTTGCGCTAGCTTTACAGGATCAAGAGAAGGCTT
CAGAAGGTGCATTGGTAGTTACCTCAAGAGAAGTTGAAGAACCGTCCATGAAGGGTTCGATGGCCAGAGGAGAGT
TACAATTAGCTGGTCTTGTGGAGATCATCCGGAGTCGTCTTATTCTAAGAACGAGGAGATAGAGTCTTTAGAGC
AGTTTTCATATGGCGACGGCAGATTCGTTAATTCGTAAGCAGATGAGCTCGATTGTGTACACGGGTCCGATTAAAG
TTCAGCAAATGAAAACTTTATCGATAGCCTGGTAGCATCACTATCTGCTGCGGTGTGCAATCTCGTCAAGATCC
TCAAAGATACAGCTGCTATTGACCTTGAAACCCGTCAAAGTTTTGGAGTCTTGGATGTTGCATCTAGGAAAGTGGT
TAATCAAACCAACGGCCAAGAGTCATGCATGGGGTGTGTTGAAACCCACGCGAGGAAGTATCATGTGGCGCTTT
TGGAATATGATGAGCAGGGTGTGGTGACATGCGATGATTGGAGAAGAGTAGCTGTTAGCTCTGAGTCTGTTGTTT
ATTCCGACATGGCGAAACTCAGAATCTGCGCAGACTGCTTCGAAACGGAGAACCGCATGTCAGTAGCGCAAAGG
TTGTTCTTGTGGAGGATTCGGGCTGTGGAAAAACCAAAGAAATCTTTCCAGGGTTAATTTTGTGATGAAGATC
TAATTTTAGTACCTGGGAAGCAAGCCGCGGAAATGATCAGAAGACGTCGCAATTCCTCAGGATATTGTTGGCCA
CGAAGGACAACGTTAAACCGTTGATTCTTTTATGATGAATTTTGGAAAAAGCACACGCTGTGCAATTCAGAGGT
TATTCATTGATGAAGGGTTGATGTTGCATACTGGTTGTGTTAATTTTCTTGTGGCGATGTCATTGTGCGAAATG
CATATGTTTACGGAGACACACAGCAGATTCCATACATCAATAGAGTTTTCAGGATTTCCCGTACCCCGCCCATTTTTG
CCAAATTGGAAGTTGACGAGGTGGAGACACGCAGAACTACTCTCCGTTGTCCAGCCGATGTCACACATTATCTGA
ACAGGAGATATGAGGGCTTTGTCATGAGCACTTCTTCGGTTAAAAAGTCTGTTTCGAGGAGATGGTCGGCGGAG
CCGCCGTGATCAATCCGATCTCAAAACCCCTTGCATGGCAAGATCCTGACTTTTACCCAATCGGATAAAAGAAGCTC
TGCTTTCAAGAGGGTATTTCAGATGTTTACACTGTGCATGAAGTGCAAGGCGAGACATACTCTGATGTTTCACTAG
TTAGGTTAACCCTTACACCGGTCTCCATCATTGCAGGAGACAGCCACATGTTTTGGTGCATTTGCAAGGCACA
CCTGTTTCGCTCAAGTACTACACTGTTGTTATGGATCCTTTAGTTAGTATCATTAGAGATCTAGAGAACTTAGCT
CGTACTTGTGATATGTATAAGGTCGATGCAGGAACACAATAGCAATTACAGATTGACTCGGTGTTCAAAGGTT
CCAATCTTTTTGTTGCAGCGCCAAAGACTGGTGATATTTCTGATATGCAGTTTTTACTATGATAAGTGTCTCCCAG
GCAACAGCACCATGATGAATAATTTTTGATGCTGTTACCATGAGGTTGACTGACATTTTCAATGAAATGTCAAAGATT
GCATATTGGATATGTCTAAGTCTGTTGCTGCGCCTAAGGATCAAATCAAACCACTAATACCTATGGTACGAACGG
CGGCAGAAATGCCACGCCAGACTGGACTATTGGAAAATTTAGTGGCGATGATTAAAAAGAACTTTAACGCACCCG
AGTTGTCTGGCATCATTGATATTGAAAATACTGCATCTTTGGTGTAGATAAGTTTTTTGATAGTTATTTGCTTA
AAGAAAAAAGAAAACCAAATAAAAAATGTTTCTTTGTTTTCAGTAGAGAGTCTCTCAATAGATGGTTAGAAAAGCAGG
AACAGGTAACAATAGGCCAGCTCGCAGATTTTGTGATTTTGTGGATTTGCCAGCAGTTGATCAGTACAGACACATGA
TTAAAGCACAAACCAACAAAAGTTGGACACTTCAATCCAACCGGAGTACCCGGCTTTGCAGACGATTTGTGTACC
ATTCAAAAAAGATCAATGCAATATTCGGCCCGTTGTTTGTAGTGTGAGCTTACTAGGCAATTACTGGACAGTGTGATT

```

CGAGCAGATTTTTGTTTTTCCACAAGAAAGACACCAGCGCAGATTGAGGATTTCTTCGGAGATCTCGACAGTCATG  
TGCCGATGGATGTCTTGGAGCTGGATATATCAAAATACGACAAATCTCAGAATGAATTCCACTGTGCAGTAGAAT  
ACGAGATCTGGCGAAGATTGGGTTTTGAAGACTTCTTGGGAGAAAGTTTGGAAACAAGGGCATAGAAAGACCACC  
TCAAGGATTATACCGCAGGTATAAAAACTTGCATCTGGTATCAAAGAAAAGAGCGGGGACGTCACGACGTTTCATTG  
GAAACACTGTGATCATTGCTGCATGTTTTGGCCTCGATGCTTCCGATGGAGAAAAATAATCAAAGGAGCCTTTTTGCG  
GTGACGATAGTCTGCTGTACTTTCCAAAGGGTTGTGAGTTTTCCGGATGTGCAACACTCCGCAAAATCTTATGTGGA  
ATTTTGAAGCAAACTGTTTTAAAAACAGTATGGATACTTTTGGCGAAGATATGTAATACATCACGACAGAGGAT  
GCATTGTGTATTACGATCCCCTAAAGTTGATCTCGAAACTTGGTGCTAAACACATCAAGGATTTGGGAACACTTGG  
AGGATTCAGAAGGTCTCTTTGTGATGTTGCTGTTTTCGTTGAACAATTGTGCGTATTACACACAGTTGGACGACG  
CTGTATGGGAGGTTTATAAGACCGCCCTCCAGGTTCTGTTTTATAAAAAGTCTGGTGAAGTATTTGTCTGATA  
AAGTTCTTTTTAGAAAGTTTGTATATAGATGGCTCTAGTTGTTAAAGGAAAAGTGAATATCAATGAGTTTATCGAC  
CTGTCAAAAATGGAGAAGATCTTACCGTCGATGTTTTACCCCTGTAAAGAGTGTATGTGTTCCAAAAGTTGATAAA  
ATAATGGTTCATGAGAATGAGTCATTGTGTCAGAGGTGAACCTTCTTAAAGGAGTTAAGCTTATTGATAGTGGATAC  
GTCTGTTTTAGCCGGTTTTGGTCGTCACGGGCGAGTGAACCTTGCCTGACAATTGCAGAGGAGGTGTGAGCGTGTGT  
CTGGTGGACAAAAGGATGGAAAGAGCCGACGAGGCCACTCTCGGATCTTACTACACAGCAGCTGCAAAAGAAAAGA  
TTTCAGTTCAAGGTCGTTCCCAATTATGCTATAACCACCCAGGACGCGATGAAAAACGTCCTGGCAAGTTTTAGTT  
AATATTAGAAATGTGAAGATGTCAGCGGGTTTTCTGTCCGCTTTCTCTGGAGTTTGTGTGCGGTGTGTATTGTTTAT  
AGAAATAATATAAAATTAGGTTTTGAGAGAGAAGATTACAAACGTGAGAGACGGAGGGCCCATGAACTTACAGAA  
GAAGTCGTTGATGAGTTCATGGAAGATGTCCCTATGTGATCAGGCTTGCAAAGTTTCGATCTCGAACCGGAAAA  
AAGAGTGATGTCCGCAAGGGGAAAAATAGTAGTAGTGTGATCGGTCAGTGCCGAACAAGAACTATAGAAAATGTTAAG  
GATTTTTGGAGGAATGAGTTTTAAAAAGAATAATTTAATCGATGATGATTTCGGAGGCTACTGTGCGCCGAATCGGAT  
TCGTTTTAAATGATCTTTACAGTATCACTACTCCATCTCAGTTTCGTGTTCTTGTCA *TCAGCGTGGGCGACCCAA  
TAGAGTTAATTAATTTATGTAATAATGCCTTAGGAAATCAGTTTTCAAAACAACAAGCTCGAACTGTGCTTCAA  
GACAATTCAGTGAGGTGTGGAAACCTTACCACAAGTAACTGTTAGGTTCCCTGACAGTGACTTTAAGGTGTACA  
GGTACAATGCGGTATTAGACCCGCTAGTCACAGCACTGTTAGGTGCATTTCGACACTAGAAAATAGAATAATAGAAG  
TTGAAAATCAGGCGAACCCACGACTGCCGAGACGTTAGATGCTACTCGTAGAGTAGACGACGCAACGGTGGGCA  
TAAGGAGCGCGATAAATAAATTTAATAGTAGAATTGATCAGAGGAACCGGATCTTATAATCGGAGCTCTTTTCGAGA  
GCTCTTCTGGTTTTGGTTTTGGACCTCTGGTCCTGCAACTTGAGGTAGTCAAGATGCATAATAAATAACGGATTGTG  
TCCGTAATCACACGTGGTGCGTACGATAACGCATAGTGTTTTTCCCTCCACTTAAATCGAAGGGTTGTGTCTTGG  
ATCGCGCGGGTCAAATGTATATGGTTCATATACATCCGACAGGCACGTAATAAAGCGAGGGGTTTCGAATCCCCCCG  
TTACCCCCGGTAGGGGCCCA*

**>TMVΔCP-GFP (sequence that replaces nucleotides 5757 to 6176 in TMV)**

ATGGTGAGCAAGGGCGAGGAGCTGTTACCCGGGGTGGTGCCCATCCTGGTCGAGCTGGACGGCGACGTAAACGGC  
CACAAGTTCAGCGTGTCCGGCGAGGGCGAGGGCGATGCCACCTACGGCAAGCTGACCCTGAAGTTCATCTGCACC  
ACCGGCAAGCTGCCCCTGCCCTGGCCACCCTCGTGACCACCCTGACCTACGGCGTGCAGTGCTTCAGCCGCTAC  
CCCGACCACATGAAGCAGCAGCACTTCTTCAAGTCCGCCATGCCCGAAGGCTACGTCCAGGAGCGCACCATCTTC  
TTCAAGGACGACGGCAACTACAAGACCCGCGCCGAGGTGAAGTTCGAGGGCGACACCCTGGTGAACCGCATCGAG  
CTGAAGGGCATCGACTTCAAGGAGGACGGCAACATCCTGGGGCACAAGCTGGAGTACAACAGCCACAAC  
GTCTATATCATGGCCGACAAGCAGAAGAACGGCATCAAGGTGAACTTCAAGATCCGCCACAACATCGAGGACGGC  
AGCGTGCAGCTCGCCGACCCTACCAGCAGAACACCCCATCGGCGACGGCCCCGTGCTGCTGCCCGACAACCAC  
TACCTGAGCACCCAGTCCGCCCTGAGCAAAGACCCCAACGAGAAGCGCGATCACATGGTCTGCTGGAGTTCGTG  
ACCGCCGCCGGGATCACTCTCGGCATGGACGAGCTGTACAAGTGA

**>TMVΔCP-AfpB (sequence that replaces nucleotides 5757 to 6176 in TMV; AP24 is in blue)**

*ATGTCCAACAACATGGGCAACCTCAGGTCCCTCCTTCGTCTTCTTCTCCTGGCCCTGGTGACCTTACTTTATGCA  
AGTAAATACGGAGGACAATGCAGTCTGAAACACAACACGTGCACGTACCTGAAGGGTGGAAAGAAACGTTATTGTC  
AACTGCGGTTTCGGCTGCCAATAAGAGGTGCAAGTCTGATCGCCACCCTGTGAATACGATGAGCACCACAGGAGG  
GTTGACTGCCAGACTCCAGTTTTGA*

**>TMVΔCP-AfpBKDEL (sequence that replaces nucleotides 5757 to 6176 in TMV; AP24 is in blue; KDEL is in green)**

*ATGTCCAACAACATGGGCAACCTCAGGTCCCTCCTTCGTCTTCTTCTCCTGGCCCTGGTGACCTTACTTTATGCA  
AGTAAATACGGAGGACAATGCAGTCTGAAACACAACACGTGCACGTACCTGAAGGGTGGAAAGAAACGTTATTGTC  
AACTGCGGTTTCGGCTGCCAATAAGAGGTGCAAGTCTGATCGCCACCCTGTGAATACGATGAGCACCACAGGAGG  
GTTGACTGCCAGACTCCAGTTAAGGACGAACTCTGA*

**>TMVΔCP-UP (sequence that replaces nucleotides 5757 to 6176 in TMV; AP24 is in blue)**

ATGTCCAACAACATGGGCAACCTCAGGTCTCCTTCGTCTTCTTCTCCTCCTGGCCCTGGTGACCTTACACTTATGCA  
GTTGACAGCCCTCAGTGGACCATCCAGAACGCCAGCGTGTCTGCAACCCCAAGACACCTCCTGCACCTGGACC  
TTCAGCATCTACCCTGGCGCCGGTGCCGCCACTCCCTGCACCTACGTGGTTGAAGGCAGCCCTGCCTCCCAGGCC  
AACGGTGGCCCCGTACCTGCGGGCATAACCGTCACTTCTGGCTGGAGCGGCCAGTTTCGGTGCAGGACAATGGC  
TTCACCACTCTCTGTGTCGACAACAACCTCTCGCCAGATCATCTGGCCTGCTTATACCGATAAGCAGCTCGCT  
GGCGGTGCGGTTGTCAAGCCTGACCAGAGCTACGCCCTGCTGCTCTCCCTTGA

>TMVΔCP-UPKDEL (sequence that replaces nucleotides 5757 to 6176 in TMV; AP24 is in blue; KDEL is in green)

ATGTCCAACAACATGGGCAACCTCAGGTCTCCTTCGTCTTCTTCTCCTCCTGGCCCTGGTGACCTTACACTTATGCA  
GTTGACAGCCCTCAGTGGACCATCCAGAACGCCAGCGTGTCTGCAACCCCAAGACACCTCCTGCACCTGGACC  
TTCAGCATCTACCCTGGCGCCGGTGCCGCCACTCCCTGCACCTACGTGGTTGAAGGCAGCCCTGCCTCCCAGGCC  
AACGGTGGCCCCGTACCTGCGGGCATAACCGTCACTTCTGGCTGGAGCGGCCAGTTTCGGTGCAGGACAATGGC  
TTCACCACTCTCTGTGTCGACAACAACCTCTCGCCAGATCATCTGGCCTGCTTATACCGATAAGCAGCTCGCT  
GGCGGTGCGGTTGTCAAGCCTGACCAGAGCTACGCCCTGCTGCTCTCCCTAAGGACGAACTCTGA

>TMVΔCP-UPVS (sequence that replaces nucleotides 5757 to 6176 in TMV; AP24 is in blue; VS is in red)

ATGTCCAACAACATGGGCAACCTCAGGTCTCCTTCGTCTTCTTCTCCTCCTGGCCCTGGTGACCTTACACTTATGCA  
GTTGACAGCCCTCAGTGGACCATCCAGAACGCCAGCGTGTCTGCAACCCCAAGACACCTCCTGCACCTGGACC  
TTCAGCATCTACCCTGGCGCCGGTGCCGCCACTCCCTGCACCTACGTGGTTGAAGGCAGCCCTGCCTCCCAGGCC  
AACGGTGGCCCCGTACCTGCGGGCATAACCGTCACTTCTGGCTGGAGCGGCCAGTTTCGGTGCAGGACAATGGC  
TTCACCACTCTCTGTGTCGACAACAACCTCTCGCCAGATCATCTGGCCTGCTTATACCGATAAGCAGCTCGCT  
GGCGGTGCGGTTGTCAAGCCTGACCAGAGCTACGCCCTGCTGCTCTCCCTGGCAACGGCCTCCTGGTTCGACACC  
ATGTGA

>TMVΔCP-AgAFP (sequence that replaces nucleotides 5757 to 6176 in TMV; AP24 is in blue)

ATGTCCAACAACATGGGCAACCTCAGGTCTCCTTCGTCTTCTTCTCCTCCTGGCCCTGGTGACCTTACACTTATGCA  
GCCACATACAATGGCAAATGCTACAAGAAGGATAATATCTGCAAGTACAAGGCACAGAGCGGCAAGACTGCCATT  
TGCAAGTGCTATGTCAAAAAGTGCCCCCGGACGGCGGCAAAATGCGAGTTTGACAGCTACAAGGGGAAGTGCTAC  
TGCTGA

>TMV (ToCP) -fGFP

(sequence that replaces nucleotides 5757 to 6176 in TMV; FLAG epitope in purple; linker in gray)

ATGGACTACAAGGACGACGATGACAAAGCAGCCGCTATGGTGAGCAAGGGCGAGGAGCTGTTACCCGGGGTGGTG  
CCCATCCTGGTTCGAGCTGGACGGCGACGTAAACGGCCACAAGTTCAGCGTGTCCGGCGAGGGCGAGGGCGATGCC  
ACCTACGGCAAGCTGACCCCTGAAGTTCATCTGCACCACCGGCAAGCTGCCCGTGCCCTGGCCACCCTCGTGACC  
ACCCTGACCTACGGCGTGCAGTGCTTCAGCCGCTACCCCGACCACATGAAGCAGCAGACTTCTTCAAGTCCGCC  
ATGCCCCAAGGCTACGTCCAGGAGCGCACCATCTTCTTCAAGGACGACGGCAACTACAAGACCCGCGCCGAGGTG  
AAGTTCGAGGGCGACACCCTGGTGAACCGCATCGAGCTGAAGGGCATCGACTTCAAGGAGGACGGCAACATCCTG  
GGCACAAGCTGGAGTACAACATAACAGCCACAACGTCTATATCATGGCCGACAAGCAGAAGAACGGCATCAAG  
GTGAACCTCAAGATCCGCCACAACATCGAGGACGGCAGCGTGCAGCTCGCCGACCACTACCAGCAGAACACCCCC  
ATCGGCGACGGCCCCGTGCTGCTGCCCCGACAACCACTACCTGAGCACCCAGTCCGCCCTGAGCAAAGACCCCAAC  
GAGAAGCGGATCACATGGTCTGCTGGAGTTCGTGACCCGCCCGGGATCACTCTCGGCATGGACGAGCTGTAC  
AAGTGA

(ToMV sequence that replaces nucleotides 6366 to 6395 in TMV)

GAACCAAATCCTCAAAAAGAGGTCCGAAAAATAATAAATTTAGGTAAGGGCGTTCAGGCGGAAGGCCCTAAAC  
CAAAAAGTTTTGATGAAGTTGAAAAAGAGTTTTGATAATTTGATTGAAGATGAAGCCGAGACGTCGGTTCGCGGATT  
CTGATTCGTATTAATATGTCTTACTCAATCACTTCTCCATCGCAATTTGTGTTTTGTATCTGTATGGGCTGA  
CCCTATAGAATTTGTTAAACGTTTGTACAAATTCGTTAGGTAACCAGTTTCAAACACAGCAAGCAAGAACTACTGT  
TCAACAGCAGTTTCAGCGAGGTGTGGAAACCTTTCCCTCAGAGCACCGTCAGATTTCTTGGCGATGTTTATAAGGT  
GTACAGGTACAATGCAGTTTTAGATCCTCTAATTAAGTTCGTTGCTGGGGTCTTTTCGATACTAGGAATAGAATAAT  
CGAAGTAGAAAACAGCAGAATCCGACAACAGCTGAAACGTTAGATGCTACCCCGAGGGTAGACGACGCTACGGT  
TGCAATTCGGTCTGCTATAAATAAATTTAGTTAATGAACTAGTAAGAGGTAAGTGGACTGTACAATCAAAAATACTTT  
TGAAAGTATGTCTGGGTTGGTCTGGACCTCTGCACCTGCATCTTAAATGCATAGGTGCTGAAAATATAAAGTTTGT  
GTTTCTAAAACACACGTGGTACGTACGATAACGTATAGTGTTTTTCCCTCCACTTAAATCGAAAAGGGTAGTGTCT  
TGGAGCGCGCGGAGTAAACATATATGGTTTCATATATGTCCGTAGCACGTAAAAAAGCGAGGGATTCGAATTCCTC  
CGGAACCCCGGGTTGGGGCCCA

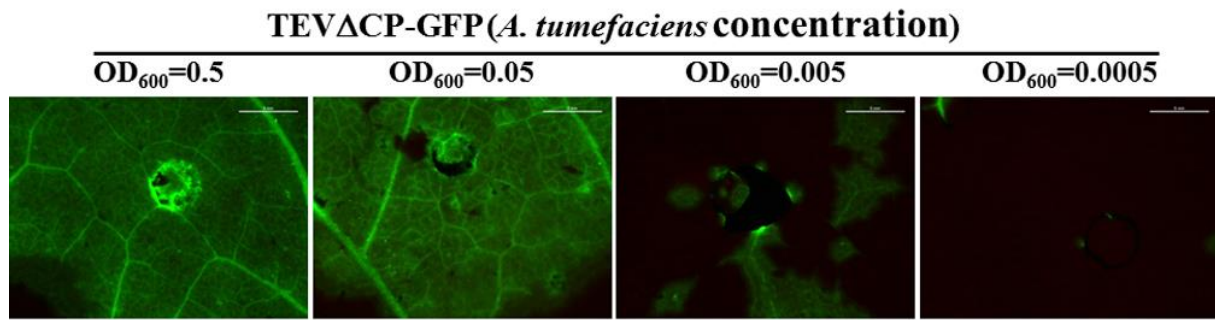

**Figure S5.** Dilution analysis of TMVΔCP-GFP infectivity in *N. benthamiana*. *A. tumefaciens* cultures to express TMVΔCP-GFP at the indicated OD<sub>600</sub> were used to infiltrate *N. benthamiana* leaves. GFP fluorescence in the agroinfiltrated areas was detected at 7 dpi using a stereomicroscope. Representative pictures of three biological replicates are shown. Bars represent 5 mm.

**Table S1.** Primers used in this work.

| <b>Primer name</b>  | <b>Sequence</b>                                         |
|---------------------|---------------------------------------------------------|
| <b>PI</b>           | 5'-TTACAAACGTGAGAGACGGAGGGCC-3'                         |
| <b>PII</b>          | 5'-GGAGGGAAAAACACTATGCGTTATC-3'                         |
| <b>PIII</b>         | 5'-GTAGAGAGAGACTGGTGATTTTCAGC-3'                        |
| <b>CP:AP24_fwd</b>  | 5'-CTCAGTTCGTGTTCTTGTC AATGTCCAACAACATGGGC-3'           |
| <b>AP24AfpB_rev</b> | 5' -TCCTCCGTATTTACTTGCATAAGTGTAGGT-3'                   |
| <b>AP24AfpB_fwd</b> | 5' -CACTTATGCAAGTAAATACGGAGGACAATGC-3'                  |
| <b>AfpB:CP_rev</b>  | 5'-CTACCTCAAGTTGCAGGACCTCAAAC TGGAGTCTGGCAG-3'          |
| <b>AfpBKDEL_rev</b> | 5'-CCCGGGTTACTAGAGTTCGTCCTTAACTGGAGTCTGGCAGTC-3'        |
| <b>KDEL:CP_rev</b>  | 5'-CTACCTCAAGTTGCAGGACCTCAGAGTTCGTCCTTAACTG-3'          |
| <b>AfpD:CP_rev</b>  | 5'-CTACCTCAAGTTGCAGGACCTCAAGGGAGAGCAGCAGG-3'            |
| <b>AfpDKDEL_rev</b> | 5'-CCCGGGTTACTAGAGTTCGTCCTTAGGGAGAGCAGCAGGGGC-3'        |
| <b>AfpDVS_rev</b>   | 5'-TCACATGGTGTGCGACCAGGAGCCGTTGCCAGGGAGAGCAGCAGGGGC- 3' |
| <b>VS:CP_rev</b>    | 5'-CTACCTCAAGTTGCAGGACCTCACATGGTGTGCGACCAG-3'           |
| <b>AgAFP:CP_rv</b>  | 5'-CTACCTCAAGTTGCAGGACCTCAGCAGTAGCACTTCCC-3'            |
